1 **Emergence of *optrA*-mediated linezolid resistance in multiple lineages and**  
2 **plasmids of *Enterococcus faecalis* revealed by long read sequencing**

3

4 Martin P McHugh<sup>1,2\*</sup>, Benjamin J Parcell<sup>1,3,#a</sup>, Kerry A Pettigrew<sup>1,#b</sup>, Geoff Toner<sup>2</sup>,  
5 Elham Khatamzas<sup>2,#c</sup>, Anne Marie Karcher<sup>3,#a</sup>, Joanna Walker<sup>3</sup>, Robert Weir<sup>4</sup>,  
6 Danièle Meunier<sup>5</sup>, Katie L Hopkins<sup>5</sup>, Neil Woodford<sup>5</sup>, Kate E Templeton<sup>2</sup>, Stephen H  
7 Gillespie<sup>1</sup>, Matthew TG Holden<sup>1\*</sup>

8

9 <sup>1</sup>School of Medicine, University of St Andrews, St Andrews, UK; <sup>2</sup>NHS Lothian  
10 Infection Service, Royal Infirmary of Edinburgh, Edinburgh, UK; <sup>3</sup>Medical  
11 Microbiology, Aberdeen Royal Infirmary, Aberdeen, UK; <sup>4</sup>Medical Microbiology, Forth  
12 Valley Royal Hospital, Larbert, UK; <sup>5</sup>Antimicrobial Resistance and Healthcare  
13 Associated Infections (AMRHAI) Reference Unit, National Infection Service, Public  
14 Health England, London, UK

15

16 #a Present address: Medical Microbiology, Ninewells Hospital, Dundee, UK

17 #b Present address: Bristol Medical School, University of Bristol, Bristol, UK

18 #c Present address: Department of Medicine III, University Hospital, LMU Munich,  
19 Germany

20

21 **\*Corresponding authors**

22 Matthew Holden [mtgh@st-andrews.ac.uk](mailto:mtgh@st-andrews.ac.uk)

23 Martin McHugh [mpm20@st-andrews.ac.uk](mailto:mpm20@st-andrews.ac.uk)

24

25 **ABSTRACT**

26 **Objectives**

27 To characterise the genetic environment of *optrA* in linezolid-resistant *Enterococcus*  
28 *faecalis* isolates from Scotland.

29 **Methods**

30 Linezolid-resistant *E. faecalis* were identified in three Scottish Health Boards and  
31 confirmed to carry the *optrA* gene at the national reference laboratory. WGS was  
32 performed with short read (Illumina MiSeq) and long read (Oxford Nanopore MinION)  
33 technologies to generate complete genome assemblies. Illumina reads for 94 *E.*  
34 *faecalis* bloodstream isolates were used to place the *optrA*-positive isolates in a  
35 larger UK phylogeny.

36 **Results**

37 Six *optrA*-positive linezolid-resistant *E. faecalis* were isolated from urogenital  
38 samples in three Scottish Health Boards (2014-2017). No epidemiological links were  
39 identified between the patients, four were community-based, and only one had  
40 recent linezolid exposure. Reference-based mapping confirmed the isolates were  
41 genetically distinct (>13,900 core SNPs). *optrA* was located on a plasmid in each  
42 isolate and these plasmids showed limited nucleotide similarity. There was variable  
43 presence of transposable elements surrounding *optrA*, (including IS1216, IS3, and  
44 Tn3) and not always as a recognisable gene cassette. OptrA amino acid sequences  
45 were also divergent, resulting in four protein variants differing in 1-20 residues. One  
46 isolate belonged to ST16 and clustered with three other isolates in the UK collection  
47 (76-182 SNPs), otherwise the *optrA*-positive isolates were genetically distinct from  
48 the bloodstream isolates (>6,000 SNPs).

49 **Conclusions**

50 We report multiple variants of the linezolid resistance gene *optrA* in diverse *E.*  
51 *faecalis* strain and plasmid backgrounds, suggesting multiple introductions of the  
52 gene into the *E. faecalis* population and selection driving recent emergence.

53

## 54 INTRODUCTION

55 *Enterococcus faecalis* and *Enterococcus faecium* are carried in the intestinal tract  
56 and are important opportunistic pathogens in humans.<sup>1</sup> Treatment of enterococcal  
57 infections is challenging due to intrinsic or acquired resistance to multiple  
58 antimicrobials including aminoglycosides, benzylpenicillin, cephalosporins,  
59 fluoroquinolones, macrolides, tetracyclines, and trimethoprim. Among the remaining  
60 treatment options, clinical *E. faecium* isolates are usually resistant to amoxicillin and  
61 resistance to vancomycin is increasingly common.<sup>2</sup> In contrast, *E. faecalis* typically  
62 remains susceptible to amoxicillin and vancomycin but can acquire significant  
63 resistance and has been implicated in the transfer of antimicrobial resistance genes  
64 to other Gram-positive pathogens, for example transmitting *vanA*-mediated  
65 vancomycin resistance to methicillin-resistant *Staphylococcus aureus*.<sup>3</sup>

66 The main treatment options for multi-drug resistant Gram-positive bacteria are  
67 the oxazolidinones linezolid or tedizolid, or the lipopeptide daptomycin. Daptomycin  
68 therapy is challenging due to significant side effects, limited efficacy in pulmonary  
69 infections, uncertain dosing regimens, and challenges with *in vitro* susceptibility  
70 determination.<sup>4</sup> Linezolid blocks protein synthesis by binding to the 50S ribosomal  
71 subunit and inhibiting formation of the initiation complex.<sup>5</sup> Linezolid resistance is  
72 uncommon, reported in  $\leq 1\%$  of bloodstream enterococcal isolates in the UK.<sup>6,7</sup> The  
73 G2576T mutation in the 23S rRNA genes can arise *de novo* during extended  
74 linezolid therapy,<sup>8</sup> although strict infection control and antimicrobial stewardship have  
75 been successful in limiting incidence.<sup>9</sup> The methyltransferases Cfr and Cfr(B), and  
76 ABC-F ribosomal protection proteins OptrA and PoxA also confer resistance to  
77 linezolid but are carried on mobile genetic elements, raising the prospect of rapid  
78 spread of linezolid resistance across genetically distinct lineages.<sup>10–12</sup> In 2015, *optrA*

79 was first reported as conferring resistance to oxazolidinones and phenicols.<sup>13</sup> Recent  
80 international surveillance shows that although linezolid resistance remains rare,  
81 *optrA* has spread to every continent and is the dominant mechanism of linezolid  
82 resistance in *E. faecalis*.<sup>14</sup> Surveillance has also detected *optrA* in the UK.<sup>15</sup> Studies  
83 into the genetic context of *optrA* have identified the gene on both the chromosome  
84 and plasmids, often associated with insertion sequence IS1216, a possible  
85 explanation for the rapid spread of *optrA*.<sup>16,17</sup> However, few studies have generated  
86 complete genome assemblies of *optrA*-carrying *E. faecalis*, which would provide high  
87 precision information on the genetic context of *optrA*.

88 Here, we investigate the epidemiological and clinical background of *optrA*-  
89 carrying *E. faecalis* isolates from human clinical samples collected in Scotland. We  
90 used whole genome sequencing to determine whether these isolates represent  
91 transmission of a single clonal lineage. We hypothesised the spread of *optrA* is  
92 driven by a single mobile genetic element, and to investigate this we made hybrid  
93 assemblies of short and long read sequencing data to generate complete genomes  
94 and to reconstruct the genetic environment of *optrA*. This study describes the first  
95 use of nanopore-based long read sequencing to investigate *optrA*-containing mobile  
96 genetic elements.

97

## 98 **MATERIALS AND METHODS**

### 99 ***Bacterial strains***

100 Isolates were selected for this study based on the presence of the *optrA* gene as  
101 determined by Public Health England's Antimicrobial Resistance and Healthcare  
102 Associated Infections (AMRHAI) Reference Unit, either as part of non-structured  
103 retrospective screening of stored isolates (prior to 2016) or as part of the reference

104 laboratory service (2016 onwards). Isolates were originally collected in three Scottish  
105 Health Boards, and as such represent a subset of Scottish *optrA*-positive isolates  
106 identified by AMRHAI. Linezolid- and chloramphenicol-resistant *E. faecalis* were  
107 isolated from six clinical samples (Table 1) using standard methods and identified  
108 with matrix-assisted laser-desorption ionisation time-of-flight mass spectrometry or  
109 the Vitek-2 GP-ID card (bioMérieux, Marcy L'Etoile, France). Antimicrobial  
110 susceptibility testing was performed with the Vitek-2 AST-607 card and interpreted  
111 with EUCAST breakpoints.<sup>18</sup> Isolates were referred to AMRHAI for characterisation  
112 of linezolid resistance mechanisms. Detection of the G2576T mutation (*Escherichia*  
113 *coli* numbering) in the 23S rRNA genes was investigated by PCR-RFLP and, from  
114 2016, by a real-time PCR-based allelic discrimination assay.<sup>19,20</sup> The *cfr* and *optrA*  
115 genes were sought by a multiplex PCR using primers for the detection of *cfr* (*cfr-fw*:  
116 5'-TGA AGT ATA AAG CAG GTT GGG AGT CA-3' and *cfr-rev*: 5'-ACC ATA TAA  
117 TTG ACC ACA AGC AGC-3')<sup>21</sup> and for the detection of *optrA* (*optrA-F*: 5'-GAC CGG  
118 TGT CCT CTT TGT CA-3' and *optrA-R*: 5'-TCA ATG GAG TTA CGA TCG CCT-3')  
119 (AMRHAI, unpublished data).

120 An *E. coli* transformant harbouring a plasmid bearing *cfr* (kindly provided by  
121 Pr S. Schwarz) was used as a control strain for the detection of *cfr*. This was  
122 replaced from 2016 by *Staphylococcus epidermidis* NCTC 13924 harbouring both *cfr*  
123 and the G2576T mutation. *E. faecium* NCTC 13923 was used as a control strain for  
124 the detection of *optrA*.

125 Access to isolates and clinical data was approved by the NHS Scotland  
126 Biorepository Network (Ref TR000126).

127

128 ***Whole genome sequencing and genomic analysis***

129 Single colonies were inoculated into brain heart infusion broth (Oxoid, Basingstoke,  
130 UK) and incubated overnight at 37°C. Genomic DNA was extracted from cell pellets  
131 using the Wizard Genomic DNA Purification Kit (Promega, Wisconsin, USA), or  
132 QiaSymphony DSP DNA Mini Kit (Qiagen, Hilden, Germany). Short read barcoded  
133 libraries were prepared using the Nextera XT kit (Illumina, San Diego, USA) and  
134 sequenced with a MiSeq instrument (Illumina) using 250 bp paired-end reads on a  
135 500-cycle v2 kit. Short reads were quality trimmed with Trimmomatic v0.36 and  
136 settings [LEADING:5 TRAILING:5 SLIDINGWINDOW:4:15 MINLEN:100].<sup>22</sup>  
137 Barcoded long read libraries were generated with the 1D Ligation Sequencing Kit  
138 (Oxford Nanopore Technologies, Oxford, UK) and sequenced with an R9.4 flow cell  
139 on a MinION sequencer (Oxford Nanopore Technologies). Base-calling and barcode  
140 de-multiplexing was performed with Albacore v2.1.3 (Oxford Nanopore  
141 Technologies) and the resulting fast5 files converted to fastq with Poretools v0.6.0,<sup>23</sup>  
142 or basecalled and de-multiplexed with Albacore v2.3.3 with direct fastq output.  
143 Porechop v0.2.3 (<https://github.com/rswick/Porechop>) was used to remove chimeric  
144 reads and trim adapter sequences. The data for this study have been deposited in  
145 the European Nucleotide Archive (ENA) at EMBL-EBI under accession number  
146 PRJEB36950 (<https://www.ebi.ac.uk/ena/data/view/PRJEB36950>).

147 To generate a UK-wide *E. faecalis* phylogenetic context for the *optrA*-positive  
148 isolates, raw sequence data was downloaded from the ENA ([www.ebi.ac.uk/ena](http://www.ebi.ac.uk/ena))  
149 under study accession numbers PRJEB4344, PRJEB4345, and PRJEB4346.<sup>24</sup> Short  
150 reads were mapped to the *E. faecalis* reference genome V583 (accession number  
151 AE016830) using SMALT v0.7.4.<sup>25</sup> Mapped assemblies were aligned and regions  
152 annotated as mobile genetic elements in the V583 genome (transposons, integrases,  
153 plasmids, phages, insertion sequences, resolvases, and recombinases; tab file of

154 regions available in Table S1) were removed from the assembly  
155 ([https://github.com/sanger-pathogens/remove\\_blocks\\_from\\_aln](https://github.com/sanger-pathogens/remove_blocks_from_aln)). All sites in the  
156 alignment with single nucleotide polymorphisms (SNPs) were extracted using SNP-  
157 sites v2.4.0<sup>26</sup> and a phylogeny was created from the core-genome SNP alignment  
158 using RAxML v8.2.8<sup>27</sup> with 100 bootstrap replicates and visualised with iTOL.<sup>28</sup>  
159 Recombination blocks were removed from ST16 isolates using Gubbins v1.4.10.<sup>29</sup>

160 Hybrid assembly was performed with Illumina short reads and Nanopore long  
161 reads using Unicycler v0.4.7<sup>30</sup> in standard mode. The resulting assemblies were  
162 annotated with Prokka v1.5.1 using a genus specific RefSeq database.<sup>31</sup> Hybrid  
163 assemblies were checked for indel errors using Ideel  
164 (<https://github.com/mw55309/ideel>) and UniProtKB TrEMBL database v2019\_1.  
165 Plasmid comparisons were generated and visualised with EasyFig v2.2.2<sup>32</sup> and  
166 BRIG v0.95.<sup>33</sup>

167 MLST typing was performed using SRST2 v0.2.0<sup>34</sup> and the *E. faecalis* MLST  
168 database (<https://pubmlst.org/efaecalis/>) sited at the University of Oxford.<sup>35,36</sup>  
169 Antimicrobial resistance mechanisms were detected using ARIBA v2.12.1<sup>37</sup> and the  
170 ResFinder database v3.0<sup>38</sup> with the addition of linezolid resistance mutations in the  
171 23S rRNA (G2505A and G2576T based on *E. coli* numbering).

172

## 173 **RESULTS AND DISCUSSION**

### 174 ***Detection of optrA-positive E. faecalis***

175 Six *E. faecalis* isolated from urogenital samples were initially identified as linezolid-  
176 and chloramphenicol-resistant in routine diagnostic laboratories and confirmed to  
177 carry *optrA* at the AMRHAI Reference Unit (Table 1). The earliest isolates in this



178 collection were from the Grampian region of Scotland in 2014, 2015, and 2016.  
179 Three more isolates were identified in 2017 from other regions of Scotland (Forth  
180 Valley and Lothian, Table 1), with no clear epidemiological links between the  
181 patients. Prior to isolation of *optrA*-positive *E. faecalis*, patients 1-3 were treated with  
182 trimethoprim for recurrent urinary tract infections, with patient 3 also receiving  
183 cefalexin. Patients 5 and 6 were managed in general practice and it was not possible  
184 to determine their antimicrobial exposure. Patient 4 was the only patient with known  
185 exposure to linezolid, a two-week course prior to the isolation of *optrA*-positive *E.*  
186 *faecalis*. Patient 4 was a surgical inpatient and another patient on the same ward  
187 had *optrA*-positive *E. faecalis* isolated from an abdominal wound, indicating possible  
188 transmission between this patient and patient 4. The *optrA*-positive *E. faecalis* from  
189 the contact of patient 4 was not available for study. Further screening of the ward  
190 environment and patients found no further linezolid-resistant enterococci or  
191 staphylococci over a two-month period, although the contact of patient 4 continued to  
192 have *optrA*-positive *E. faecalis* isolated from their abdominal wound for a month until  
193 discharge.

#### 194 ***optrA* is carried by distinct strains**

195 Whole genome sequencing was performed to investigate the genetic relationship  
196 between the isolates. *In silico* MLST showed the six isolates belonged to different  
197 sequence types (STs), suggesting they were genetically distinct (Table 1). To further  
198 confirm this, we analysed SNPs in the core genomes of the *optrA*-positive isolates  
199 and found the isolates differed by a median 18,806 SNPs (range 13,909 – 22,272).  
200 Previous estimates suggest a genetic diversification rate of 2.5-3.4 SNPs/year for *E.*  
201 *faecalis*, highlighting the *optrA*-positive strains share a very distant common  
202 ancestor.<sup>24</sup>

### 203 ***optrA* is carried on diverse plasmids**

204 We then examined the genetic context of *optrA* in each isolate. Initial *de novo*  
205 assembly of short-read data generated fragmented assemblies (72-135 contigs,  
206 mean N50 198 kb), but with *optrA* present on moderate sized contigs (11-44 kb).  
207 Three *optrA*-positive contigs carried plasmid-associated replication or transfer genes,  
208 but none represented a complete plasmid, or had increased read depth coverage  
209 compared to core genes indicative of being multicopy. Therefore, it was unclear if  
210 *optrA* was carried on plasmids (often present in multiple copies within a cell) or the  
211 chromosome, and how similar these regions were between the six isolates. To  
212 resolve repetitive regions and try to complete the genome assemblies we utilised  
213 Nanopore sequencing to generate long reads, and then combined these with  
214 Illumina short reads to produce high quality hybrid assemblies. In four of the isolates  
215 completed genomes were obtained, with the other two generating near-complete  
216 genomes (Table S2). Analysis of the six hybrid assemblies showed <3 % putative  
217 coding sequences were shorter than the closest reference match (Table S2)  
218 indicating the hybrid assembly process removed most indel errors and the short  
219 coding sequences were likely to be true pseudogenes.<sup>39</sup> The hybrid assemblies  
220 contained between one and three plasmids ranging in size from 11-80 kb, with *optrA*  
221 present on a single complete plasmid in each isolate (Table 2).

222 In general, the *optrA*-positive plasmids had limited sequence identity, although  
223 pBX5936-1 (69 kb) and pTM6294-2 (53 kb) had 97% average nucleotide identity  
224 over 40 kb aligned sequence. These two plasmids also had several unique regions  
225 indicating the plasmids shared a backbone but had distinct additional content (Figure  
226 S1). *optrA* and the phenicol resistance gene, *fexA*, were located in the same  
227 orientation and within 550-750 nucleotides of each other, with a short (~200

228 nucleotides) hypothetical coding sequence in the intervening region (Figure 1).  
229 Additionally, limited similarity was seen between the Scottish *optrA*-positive plasmids  
230 and the first identified *optrA*-positive plasmid from China (pE394, accession  
231 KP399637; Figure S2).

232 A number of insertion sequence transposases were identified in the *optrA*-  
233 positive plasmids, although we were unable to identify many beyond the family level  
234 due to limited matches in public databases (Table 2). We found evidence of IS1216  
235 in all the *optrA*-positive plasmids, although only pBX5936-1 and pBX8117-2 had  
236 IS1216 flanking the *optrA* and *fexA* region as a cassette (Figure 1). BLASTn  
237 comparison of pWE0254-1 with the other *optrA*-positive plasmids highlighted a  
238 partial IS1216 transposase that was not identified by automated annotation.  
239 Immediately upstream of the partial IS1216 was an IS3-family transposase, the  
240 insertion of which likely disrupted the IS1216 (Figure S1). pWE0438 had Tn3-family  
241 transposases surrounding *optrA* and *fexA*, as well genes encoding resolvases, which  
242 may represent a transposable unit (Figure 1). pWE0851-1 carried one IS1216  
243 transposase upstream and one Tn3-transposase downstream of *optrA/fexA*, but also  
244 had multiple copies of IS3-family transposases throughout the plasmid so multiple  
245 possible mechanisms of transposition exist (Table 2, Figure S1). pTM6294-2 had  
246 one IS1216 transposase and one ISL3-family transposase surrounding *optrA/fexA*.  
247 The variable presence of IS1216 in these isolates suggest other means of  
248 transposition may also be important in the spread of *optrA*, including IS3-family and  
249 Tn3-family transposases.

250 ***optrA* sequences vary between isolates**

251 Comparison of the OptrA amino acid sequence from each isolate revealed  
252 different variants of the resistance protein: two isolates had the same sequence as  
253 the first identified OptrA from pE394 , BX5936 had a single substitution, WE0851  
254 had two substitutions, WE0348 had three substitutions, and BX8117 had 20  
255 substitutions (Table 2). BX5936 and BX8117 had novel OptrA sequences not yet  
256 described in the literature. The OptrA sequence from BX8117 was similar to E35048  
257 detected in an *E. faecium* isolated in Italy in 2015 with the two OptrA sequences  
258 differing at three amino acid positions.<sup>40</sup> Over 40 OptrA sequence variants have  
259 been described, although the role of this sequence variation is unclear as they do not  
260 significantly differ in their linezolid minimum inhibitory concentration *in vitro*.<sup>41,42</sup>

261 The degree of sequence variation between the six FexA proteins was less  
262 than that seen in OptrA. Comparison to the first reported FexA (AJ549214) showed  
263 four common variants in all strains (A34S, L39S, I131V, and V305I), with all but  
264 BX8117 having an additional D50A variant. This suggests there is a more diverse  
265 background of *optrA* sequences compared to *fexA*, and/or there is ongoing  
266 diversifying selective pressure applied only to *optrA* despite the close genetic linkage  
267 of the two genes.

268 Of note, all six isolates had an inferred OptrA sequence 18 amino acids  
269 shorter than most public sequences. Inclusion of the 18 upstream amino acids  
270 showed that all six isolates had an M1L variant compared to OptrA<sub>pE394</sub>. We believe  
271 this is an artefact introduced during coding sequence prediction. The first *optrA*  
272 genes were identified *in silico* using ORFfinder  
273 (<https://www.ncbi.nlm.nih.gov/orffinder>), which detects putative coding sequences  
274 based on the presence of in-frame start and stop codons only. We used Prokka for  
275 genome annotation which implements Prodigal to score potential coding sequences

276 based on start/stop codon position, coding sequence length, and upstream promoter  
277 regions and outputs the highest confidence coding sequences. Indeed, most  
278 published *optrA* sequences start with nucleotide codons TTG (usually encoding  
279 leucine), but the corresponding amino acid sequences start with methionine  
280 indicating this codon has been designated as a start codon. The only other report of  
281 the M1L variant is from a study that also used Prokka for annotation.<sup>43</sup> Given the  
282 possible effect of methodology on identification of the first amino acid we have not  
283 reported the M1L variant in our results but mention it here for completeness. The  
284 true *optrA* start codon should be confirmed to aid ongoing surveillance efforts.

#### 285 ***optrA*-positive strains are distantly related to bloodstream isolates**

286 To investigate whether the *optrA*-positive isolates represented common *E. faecalis*  
287 strains in the UK, publicly available sequence data of 94 *E. faecalis* isolates from the  
288 British Society for Antimicrobial Chemotherapy (BSAC) bacteraemia surveillance  
289 programme (isolated between 2001 and 2011) were analysed together with the six  
290 known *optrA*-positive isolates.<sup>24</sup> We first looked for determinants of linezolid  
291 resistance in the 94 sequences, and found no evidence of *cfr*, *cfr(B)*, *cfr(D)*, *optrA*,  
292 *poxxA*, or the G2505A 23S rRNA gene mutation. Only one of the BSAC isolates  
293 (accession ERS324700) carried the G2576T 23S rRNA gene mutation conferring  
294 linezolid resistance. Core genome phylogeny showed BX8117 was related to three  
295 other ST16 isolates from the UK, after removal of putative recombination blocks  
296 there were 76, 81, and 182 SNPs between these isolates suggesting they diverged  
297 from a common background but are not linked to recent transmission (Figure 2).  
298 ST16 has been associated with multidrug-resistant infections in humans and  
299 animals, highlighting the potential for the emergence of linezolid resistance in  
300 invasive enterococcal infections.<sup>44</sup> The other five *optrA*-positive isolates have no

301 close genetic links in this phylogeny (minimum pairwise SNPs 12,314 – 17,891). Our  
302 study is not designed to infer patterns across Scotland and the rest of the UK, but  
303 our findings suggest the *optrA*-positive isolates are generally distinct from those  
304 recently causing bloodstream infections in the UK.

### 305 ***optrA*-positive *E. faecalis* harbour multiple resistance mechanisms**

306 Looking at all assembled plasmids, the isolates carried genes conferring resistance  
307 to aminoglycosides (*ant(6)*-Ia, *aph(3')*-IIIa, *aac(6')*-Ie-*aph(2'')*-Ia, and others listed in  
308 Table 2), chloramphenicol (*catA8*), bacitracin (*bcrA*), macrolides (*ermA*-like, *ermB*),  
309 tetracyclines (*tet(L)*, *tet(M)*), trimethoprim (*dfpG*), and the heavy metals cadmium  
310 (*cadA*) and copper (*copZ*). However, the pattern of carried genes differed between  
311 isolates with only *optrA* and *fexA* found in all isolates (Table 2).

312 pBX8117-2 carried a gene with 100% nucleotide identity and coverage to  
313 *cfr(D)* from *Enterococcus faecium* isolated in France in 2015, and in Australia in  
314 2019.<sup>45,46</sup> In both isolates, *optrA* and *cfr(D)* genes were present on different contigs  
315 based on short-read sequencing. Our study is the first to detect *cfr(D)* in *E. faecalis*  
316 and using hybrid assembly we identified co-carriage of *optrA* and *cfr(D)* on the same  
317 plasmid. The French and Australian *cfr(D)*-positive isolates also carried *vanA*-type  
318 vancomycin resistance genes, although the Australian isolate was phenotypically  
319 vancomycin sensitive due to the loss of the regulatory genes *vanR* and *vanS*. At  
320 present, no *in vitro* work has described the impact of *cfr(D)* on antimicrobial  
321 resistance in enterococci so it is unclear whether or not *cfr(D)* confers the PhLOPS<sub>A</sub>  
322 multiresistance phenotype originally described with Cfr.<sup>47</sup>

323 There is evidence of *optrA* being more common in particular *E. faecalis*  
324 lineages, with ST16, ST330, ST480, and ST585 in particular being described here

325 and in other studies.<sup>14,48–50</sup> These *optrA*-positive lineages are not specific to one host  
326 species and have been isolated from humans, animals, and the environment.<sup>43,51</sup>  
327 Florfenicol use in food animals is associated with the presence of *optrA* in animal  
328 waste and the environment surrounding livestock farms.<sup>52,53</sup> Additionally, *optrA*-  
329 positive enterococci and staphylococci have been isolated from raw food purchased  
330 from retail stores in China, Columbia, Denmark, and Tunisia.<sup>51,54–56</sup> Wu *et al.* (2019)  
331 found evidence of transmission of *optrA*-positive *E. faecalis* from raw meat to a dog  
332 in China.<sup>56</sup> However, the incidence of *optrA*-positive isolates in raw foods was low in  
333 the available studies, and there is currently no direct evidence to suggest *optrA*-  
334 positive strains are transmitted to humans via the food chain.<sup>57,58</sup> Increasing use of  
335 linezolid in human medicine may also select for *optrA*-positive strains, and once  
336 carried in the gut may be co-selected by other antimicrobials given the multidrug  
337 resistance phenotype of these isolates. The role of antimicrobial use, animal contact,  
338 food hygiene, and the environment in transmission of *optrA*-positive strains should  
339 be investigated further.

340 Our finding that *optrA* is present as different gene variants, carried on different  
341 mobile genetic elements, in unrelated strains of *E. faecalis* suggest a diverse *optrA*  
342 reservoir that is only partly investigated in this study. As well as *optrA*, the *cfp* and  
343 *poxtA* genes are emerging transferable linezolid resistance mechanisms. Further  
344 studies from a One Health perspective are warranted to understand the selection  
345 pressures driving transferable linezolid resistance, and the transmission dynamics of  
346 these strains to avoid further spread of linezolid resistance within *E. faecalis* and  
347 other Gram-positive bacteria.

348

## 349 **ACKNOWLEDGEMENTS**

350 The authors would like to thank the Bioinformatics Unit at the University of St  
351 Andrews and Pathogen Informatics at the Wellcome Sanger Institute for access to  
352 high performance computing clusters.

353

## 354 **FUNDING**

355 This work was supported by the Chief Scientist Office (Scotland) through the  
356 Scottish Healthcare Associated Infection Prevention Institute (Reference SIRN/10).

357

## 358 **TRANSPARENCY DECLARATION**

359 The authors report no conflicts of interest related to this work.

360

## 361 **REFERENCES**

362 1. García-Solache M, Rice LB. The Enterococcus: A model of adaptability to its environment.  
363 *Clin Microbiol Rev* 2019; **32**: e00058-18.

364 2. ECDC. Surveillance of antimicrobial resistance in Europe – Annual report of the European  
365 Antimicrobial Resistance Surveillance Network (EARS-Net) 2017. 2018. Available at:  
366 [http://www.ecdc.europa.eu/sites/portal/files/documents/EARS-Net-report-2017-update-jan-](http://www.ecdc.europa.eu/sites/portal/files/documents/EARS-Net-report-2017-update-jan-2019.pdf)  
367 [2019.pdf](http://www.ecdc.europa.eu/sites/portal/files/documents/EARS-Net-report-2017-update-jan-2019.pdf). Accessed September 19, 2019.

368 3. Weigel LM, Clewell DB, Gill SR, *et al*. Genetic analysis of a high-level vancomycin-  
369 resistant isolate of *Staphylococcus aureus*. *Science* 2003; **302**: 1569–71.

370 4. Humphries RM. The new, new daptomycin breakpoint for *Enterococcus* spp. *J Clin*  
371 *Microbiol* 2019; **57**: e00600-19.

372 5. Zahedi Bialvaei A, Rahbar M, Yousefi M, *et al*. Linezolid: a promising option in the  
373 treatment of Gram-positives. *J Antimicrob Chemother* 2017; **72**: 354–64.

374 6. Public Health England. *English surveillance programme for antimicrobial utilisation and*  
375 *resistance (ESPAUR) Report 2018-2019*. London, UK: PHE; 2019. Available at:



- 376 [https://www.gov.uk/government/publications/english-surveillance-programme-antimicrobial-  
377 utilisation-and-resistance-espaur-report](https://www.gov.uk/government/publications/english-surveillance-programme-antimicrobial-377 utilisation-and-resistance-espaur-report).
- 378 7. Health Protection Scotland. *Scottish One Health Antimicrobial Use and Resistance in*  
379 *2018 Annual Report*. Glasgow, UK: HPS; 2019. Available at:  
380 [https://www.hps.scot.nhs.uk/web-resources-container/scottish-one-health-antimicrobial-use-  
381 and-antimicrobial-resistance-in-2018/](https://www.hps.scot.nhs.uk/web-resources-container/scottish-one-health-antimicrobial-use-381 and-antimicrobial-resistance-in-2018/).
- 382 8. Mendes RE, Deshpande LM, Jones RN. Linezolid update: Stable *in vitro* activity following  
383 more than a decade of clinical use and summary of associated resistance mechanisms.  
384 *Drug Resist Updat* 2014; **17**: 1–12.
- 385 9. Abbo L, Shukla BS, Giles A, *et al*. Linezolid and vancomycin-resistant *Enterococcus*  
386 *faecium* in solid organ transplant recipients: Infection control and antimicrobial stewardship  
387 using whole genome sequencing. *Clin Infect Dis* 2019; **69**: 259–65.
- 388 10. Antonelli A, D’Andrea MM, Brenciani A, *et al*. Characterization of *poxtA*, a novel  
389 phenicol–oxazolidinone–tetracycline resistance gene from an MRSA of clinical origin. *J*  
390 *Antimicrob Chemother* 2018; **73**: 1763–9.
- 391 11. Deshpande LM, Ashcraft DS, Kahn HP, *et al*. Detection of a new *cfr*-like gene, *cfr*(B), in  
392 *Enterococcus faecium* isolates recovered from human specimens in the United States as  
393 part of the SENTRY Antimicrobial Surveillance Program. *Antimicrob Agents Chemother*  
394 2015; **59**: 6256–61.
- 395 12. Diaz L, Kiratisin P, Mendes RE, *et al*. Transferable Plasmid-Mediated Resistance to  
396 Linezolid Due to *cfr* in a Human Clinical Isolate of *Enterococcus faecalis*. *Antimicrob Agents*  
397 *Chemother* 2012; **56**: 3917–22.
- 398 13. Wang Y, Lv Y, Cai J, *et al*. A novel gene, *optrA*, that confers transferable resistance to  
399 oxazolidinones and phenicols and its presence in *Enterococcus faecalis* and *Enterococcus*  
400 *faecium* of human and animal origin. *J Antimicrob Chemother* 2015; **70**: 2182–90.
- 401 14. Deshpande LM, Castanheira M, Flamm RK, *et al*. Evolving oxazolidinone resistance  
402 mechanisms in a worldwide collection of enterococcal clinical isolates: Results from the  
403 SENTRY Antimicrobial Surveillance Program. *J Antimicrob Chemother* 2018; **73**: 2314–22.
- 404 15. Health Protection Scotland. Oxazolidinone-resistance due to *optrA* in *Enterococcus*  
405 *faecalis*. *HPS Wkly Rep* 2016; **50**: 230–1.
- 406 16. Cai J, Wang Y, Schwarz S, *et al*. High detection rate of the oxazolidinone resistance  
407 gene *optrA* in *Enterococcus faecalis* isolated from a Chinese anorectal surgery ward. *Int J*  
408 *Antimicrob Agents* 2016; **48**: 757–9.
- 409 17. He T, Shen Y, Schwarz S, *et al*. Genetic environment of the transferable  
410 oxazolidinone/phenicol resistance gene *optrA* in *Enterococcus faecalis* isolates of human  
411 and animal origin. *J Antimicrob Chemother* 2016; **71**: 1466–73.
- 412 18. EUCAST. *Breakpoint tables for interpretation of MICs and zone diameters*. 2018.
- 413 19. Woodford N, Tysall L, Auckland C, *et al*. Detection of oxazolidinone-resistant  
414 *Enterococcus faecalis* and *Enterococcus faecium* strains by real-time PCR and PCR-  
415 restriction fragment length polymorphism analysis. *J Clin Microbiol* 2002; **40**: 4298–300.

- 416 20. Werner G, Strommenger B, Klare I, *et al.* Molecular detection of linezolid resistance in  
417 *Enterococcus faecium* and *Enterococcus faecalis* by use of 5' nuclease real-time PCR  
418 compared to a modified classical approach. *J Clin Microbiol* 2004; **42**: 5327–31.
- 419 21. Kehrenberg C, Schwarz S. Distribution of florfenicol resistance genes *fexA* and *cfp*  
420 among chloramphenicol-resistant *Staphylococcus* isolates. *Antimicrob Agents Chemother*  
421 2006; **50**: 1156–63.
- 422 22. Bolger AM, Lohse M, Usadel B. Trimmomatic: A flexible trimmer for Illumina sequence  
423 data. *Bioinforma Oxf Engl* 2014; **30**: 2114–20.
- 424 23. Loman NJ, Quinlan AR. Poretools: a toolkit for analyzing nanopore sequence data.  
425 *Bioinformatics* 2014; **30**: 3399–401.
- 426 24. Raven KE, Reuter S, Gouliouris T, *et al.* Genome--based characterization of hospital-  
427 adapted *Enterococcus faecalis* lineages. *Nat Microbiol* 2016; **1**.
- 428 25. Ponstingl H, Ning Z. SMALT. *Wellcome Trust Sanger Inst* 2014. Available at:  
429 <http://www.sanger.ac.uk/science/tools/smalt-0>. Accessed June 21, 2017.
- 430 26. Page AJ, Taylor B, Delaney AJ, *et al.* SNP-sites: Rapid efficient extraction of SNPs from  
431 multi-FASTA alignments. *Microb Genomics* 2016; **2**: e000056.
- 432 27. Stamatakis A. RAxML version 8: A tool for phylogenetic analysis and post-analysis of  
433 large phylogenies. *Bioinformatics* 2014; **30**: 1312–3.
- 434 28. Letunic I, Bork P. Interactive tree of life (iTOL) v3: an online tool for the display and  
435 annotation of phylogenetic and other trees. *Nucleic Acids Res* 2016; **44**: W242–5.
- 436 29. Croucher NJ, Page AJ, Connor TR, *et al.* Rapid phylogenetic analysis of large samples  
437 of recombinant bacterial whole genome sequences using Gubbins. *Nucleic Acids Res* 2015;  
438 **43**: e15.
- 439 30. Wick RR, Judd LM, Gorrie CL, *et al.* Unicycler: Resolving bacterial genome assemblies  
440 from short and long sequencing reads. *PLOS Comput Biol* 2017; **13**: e1005595.
- 441 31. Pruitt KD, Tatusova T, Brown GR, *et al.* NCBI Reference Sequences (RefSeq): current  
442 status, new features and genome annotation policy. *Nucleic Acids Res* 2012; **40**: D130–5.
- 443 32. Sullivan MJ, Petty NK, Beatson SA. Easyfig: A genome comparison visualizer.  
444 *Bioinformatics* 2011; **27**: 1009–10.
- 445 33. Alikhan N-F, Petty NK, Ben Zakour NL, *et al.* BLAST Ring Image Generator (BRIG):  
446 simple prokaryote genome comparisons. *BMC Genomics* 2011; **12**: 402.
- 447 34. Inouye M, Dashnow H, Raven L-A, *et al.* SRST2: Rapid genomic surveillance for public  
448 health and hospital microbiology labs. *Genome Med* 2014; **6**: 1–16.
- 449 35. Jolley KA, Maiden MC. BIGSdb: Scalable analysis of bacterial genome variation at the  
450 population level. *BMC Bioinformatics* 2010; **11**: 595.
- 451 36. Ruiz-Garbajosa P, Bonten MJM, Robinson DA, *et al.* Multilocus sequence typing scheme  
452 for *Enterococcus faecalis* reveals hospital-adapted genetic complexes in a background of  
453 high rates of recombination. *J Clin Microbiol* 2006; **44**: 2220–8.

- 454 37. Hunt M, Mather AE, Sánchez-Busó L, *et al.* ARIBA: Rapid antimicrobial resistance  
455 genotyping directly from sequencing reads. *Microb Genomics* 2017; **3**: e000131.
- 456 38. Zankari E, Hasman H, Kaas RS, *et al.* Genotyping using whole-genome sequencing is a  
457 realistic alternative to surveillance based on phenotypic antimicrobial susceptibility testing. *J*  
458 *Antimicrob Chemother* 2013; **68**: 771–7.
- 459 39. Goodhead I, Darby AC. Taking the pseudo out of pseudogenes. *Curr Opin Microbiol*  
460 2015; **23**: 102–9.
- 461 40. Brenciani A, Morroni G, Vincenzi C, *et al.* Detection in Italy of two clinical *Enterococcus*  
462 *faecium* isolates carrying both the oxazolidinone and phenicol resistance gene *optrA* and a  
463 silent multiresistance gene *cfr*. *J Antimicrob Chemother* 2016; **71**: 1118–9.
- 464 41. Cai J, Schwarz S, Chi D, *et al.* Faecal carriage of *optrA*-positive enterococci in  
465 asymptomatic healthy humans in Hangzhou, China. *Clin Microbiol Infect* 2019; **25**: 630.e1-  
466 630.e6.
- 467 42. Morroni G, Brenciani A, Simoni S, *et al.* Nationwide surveillance of novel oxazolidinone  
468 resistance gene *optrA* in *Enterococcus* isolates in China from 2004 to 2014. *Front Microbiol*  
469 2017; **8**: 1631.
- 470 43. Freitas AR, Elghaieb H, León-Sampedro R, *et al.* Detection of *optrA* in the African  
471 continent (Tunisia) within a mosaic *Enterococcus faecalis* plasmid from urban wastewaters.  
472 *J Antimicrob Chemother* 2017; **72**: 3245–51.
- 473 44. Larsen J, Schønheyder HC, Lester CH, *et al.* Porcine-origin gentamicin-resistant  
474 *Enterococcus faecalis* in humans, Denmark. *Emerg Infect Dis* 2010; **16**: 682–4.
- 475 45. Pang S, Boan P, Lee T, *et al.* Linezolid-resistant ST872 *Enterococcus faecium*  
476 harbouring *optrA* and *cfr* (D) oxazolidinone resistance genes. *Int J Antimicrob Agents* 2020;  
477 **55**: 105831.
- 478 46. Sassi M, Guerin F, Zouari A, *et al.* Emergence of *optrA*-mediated linezolid resistance in  
479 enterococci from France, 2006–2016. *J Antimicrob Chemother* 2019; **74**: 1469–72.
- 480 47. Long KS, Poehlsgaard J, Kehrenberg C, *et al.* The Cfr rRNA methyltransferase confers  
481 resistance to phenicols, lincosamides, oxazolidinones, pleuromutilins, and streptogramin A  
482 antibiotics. *Antimicrob Agents Chemother* 2006; **50**: 2500–5.
- 483 48. Cai J, Wang Y, Schwarz S, *et al.* Enterococcal isolates carrying the novel oxazolidinone  
484 resistance gene *optrA* from hospitals in Zhejiang, Guangdong, and Henan, China, 2010-  
485 2014. *Clin Microbiol Infect* 2015; **21**: 1095.e1-1095.e4.
- 486 49. Bender JK, Fleige C, Lange D, *et al.* Rapid emergence of highly variable and  
487 transferable oxazolidinone and phenicol resistance gene *optrA* in German *Enterococcus*  
488 spp. clinical isolates. *Int J Antimicrob Agents* 2018; **52**: 819–27.
- 489 50. Hua R, Xia Y, Wu W, *et al.* Molecular epidemiology and mechanisms of 43 low-level  
490 linezolid-resistant *Enterococcus faecalis* strains in Chongqing, China. *Ann Lab Med* 2019;  
491 **39**: 36–42.
- 492 51. Elghaieb H, Freitas AR, Abbassi MS, *et al.* Dispersal of linezolid-resistant enterococci  
493 carrying *poxTA* or *optrA* in retail meat and food-producing animals from Tunisia. *J Antimicrob*  
494 *Chemother* 2019; **75**: 2865–9.

- 495 52. Munk P, Knudsen BE, Lukjancenko O, *et al.* Abundance and diversity of the faecal  
496 resistome in slaughter pigs and broilers in nine European countries. *Nat Microbiol* 2018; **3**:  
497 898–908.
- 498 53. Zhao Q, Wang Y, Wang S, *et al.* Prevalence and abundance of florfenicol and linezolid  
499 resistance genes in soils adjacent to swine feedlots. *Sci Rep* 2016; **6**: 1–7.
- 500 54. Cavaco LM, Bernal JF, Zankari E, *et al.* Detection of linezolid resistance due to the *optrA*  
501 gene in *Enterococcus faecalis* from poultry meat from the American continent (Colombia). *J*  
502 *Antimicrob Chemother* 2017; **72**: 678–83.
- 503 55. Cavaco LM, Korsgaard H, Kaas RS, *et al.* First detection of linezolid resistance due to  
504 the *optrA* gene in enterococci isolated from food products in Denmark. *J Glob Antimicrob*  
505 *Resist* 2017; **9**: 128–9.
- 506 56. Wu Y, Fan R, Wang Y, *et al.* Analysis of combined resistance to oxazolidinones and  
507 phenicols among bacteria from dogs fed with raw meat/vegetables and the respective food  
508 items. *Sci Rep* 2019; **9**: 15500.
- 509 57. Chang Q, Wang W, Regev-Yochay G, *et al.* Antibiotics in agriculture and the risk to  
510 human health: How worried should we be? *Evol Appl* 2015; **8**: 240–7.
- 511 58. Bortolaia V, Espinosa-Gongora C, Guardabassi L. Human health risks associated with  
512 antimicrobial-resistant enterococci and *Staphylococcus aureus* on poultry meat. *Clin*  
513 *Microbiol Infect* 2016; **22**: 130–40.
- 514
- 515

516  
517

**Table 1. Details of the *optrA*-positive *E. faecalis* characterized in this study**

| <b>Patient ID</b> | <b>Isolate</b> | <b>Year</b> | <b>Region</b> | <b>Patient Sex</b> | <b>Patient Age</b> | <b>Sample</b> | <b>Source</b> | <b>MLST</b> |
|-------------------|----------------|-------------|---------------|--------------------|--------------------|---------------|---------------|-------------|
| 1                 | WE0851         | 2014        | Grampian      | Female             | 21                 | Urine         | Outpatient    | 480         |
| 2                 | WE0254         | 2015        | Grampian      | Male               | 71                 | Urine         | Outpatient    | 19          |
| 3                 | WE0438         | 2016        | Grampian      | Female             | 58                 | Urine         | Inpatient     | 330         |
| 4                 | TM6294         | 2017        | Forth Valley  | Female             | 74                 | Urine         | Inpatient     | 585         |
| 5                 | BX5936         | 2017        | Lothian       | Male               | 60                 | Semen         | Outpatient    | 894         |
| 6                 | BX8117         | 2017        | Lothian       | Female             | 19                 | Urine         | Outpatient    | 16          |

518  
519

**Table 2.** Plasmids from Hybrid Assemblies

| Isolate | Element   | Copy Number <sup>a</sup> | Size (bp) | Plasmid rep type | Best NCBI match                                                      | Resistance genes                                                                                                         | Variation compared to <i>optrA</i> <sub>pE394<sup>b</sup></sub>                                                                        | Transposases (n)        |
|---------|-----------|--------------------------|-----------|------------------|----------------------------------------------------------------------|--------------------------------------------------------------------------------------------------------------------------|----------------------------------------------------------------------------------------------------------------------------------------|-------------------------|
| BX5936  | pBX5936-1 | 1                        | 68656     | rep9             | Efs pE035, coverage 65%, 98% ID (MK140641)                           | <i>fexA, optrA</i>                                                                                                       | S2F                                                                                                                                    | ISEf1 (2)<br>IS1216 (2) |
|         | pBX5936-2 | 1                        | 51669     | rep9             | Efs FC unnamed plasmid1, coverage 85%, 100% ID (CP028836)            | <i>catA8, tet(L), tet(M), ant(6)-Ia, cadA, copZ, ermB</i>                                                                | -                                                                                                                                      | NA                      |
| BX8117  | pBX8117-1 | 1                        | 68773     | rep9             | Efs FDAARGOS_324 unnamed plasmid2, coverage 100%, 100% ID (CP028284) | None                                                                                                                     | -                                                                                                                                      | NA                      |
|         | pBX8117-2 | 1                        | 41839     | rep9             | Efs pEF123, coverage 64%, 98% ID (KX579977)                          | <i>catA8, cfr(D), optrA, fexA</i>                                                                                        | K3E, N12Y, E37K, N122K, Y135C, Y176D, A350V, V395A, A396S, Q509K, Q541E, M552L, N560Y, K562N, Q565K, E614Q, I627L, D633E, N640I, R650G | IS1216 (5)              |
| TM6294  | pTM6294-1 | 1                        | 75362     | rep9             | Efs FC unnamed plasmid1, coverage 74%, 99% ID (CP028836)             | <i>catA8, tet(L), tet(M), ant(6)-Ia, cadA, copZ, ermB, aph(3')-IIIa, sat4, ant(6)-Ia, lnuB, lsaE, ant(9), ant(6)-Ia,</i> | -                                                                                                                                      | NA                      |

|        |                        |   |       |         |                                                                    |                                                                                                  |                   |                                                                                 |
|--------|------------------------|---|-------|---------|--------------------------------------------------------------------|--------------------------------------------------------------------------------------------------|-------------------|---------------------------------------------------------------------------------|
|        |                        |   |       |         |                                                                    | <i>aac(6')-le-aph(2'')-la, aadK, ermB, dfrG</i>                                                  |                   |                                                                                 |
|        | pTM6294-2              | 1 | 52776 | rep9    | Efs pE035, coverage 87%, 99% ID (MK140641)                         | <i>fexA, oprA</i>                                                                                | None              | ISL3-family (1)<br>IS1216 (1)                                                   |
| WE0254 | pWE0254-1              | 1 | 80496 | repUS11 | Efs FDAARGOS_324 unnamed plasmid3, coverage 49%, 99% ID (CP028283) | <i>ant(9)-la, ermA-like, fexA, oprA</i>                                                          | None              | IS3-family (8)<br>IS1216-partial (1)                                            |
|        | pWE0254-2 <sup>c</sup> | 1 | 79293 | NA      | Efs NCTC8732 chromosome, coverage 99%, 100% ID (LR594051)          | None                                                                                             | -                 | NA                                                                              |
| WE0438 | pWE0438                | 1 | 61284 | rep9    | Efs pEF123, coverage 76%, 99% ID (KX579977)                        | <i>tet(L), tet(M), bcrA, cadA, copZ, ant(6)-la, oprA, fexA, ermB</i>                             | K3E, Y176D, I622M | IS1216 (1)<br>ISEnfa1 (2)<br>IS3-family (4)<br>IS6-family (1)<br>Tn3-family (2) |
| WE0851 | pWE0851-1              | 1 | 59708 | repUS11 | Efs pEF123, coverage 22%, 100% ID (KX579977)                       | <i>fexA, oprA, ermA-like</i>                                                                     | T112K, Y176D      | IS1216 (1)<br>IS3-family (6)<br>Tn3-family (1)                                  |
|        | pWE0851-2              | 1 | 26996 | repUS11 | Efs pKUB3007-3, coverage 63%, 100% ID (AP018546)                   | <i>aac(6')-le-aph(2'')-la</i>                                                                    | -                 | NA                                                                              |
|        | pWE0851-3              | 3 | 10826 | NA      | Efs pE035, coverage 63%, 99% ID (MK140641)                         | <i>aac(6')-le-aph(2'')-la, aac(6')-le-aph(2'')-la, aadK, ermB, ant(6)-la, aph(3')-IIIa, sat4</i> | -                 | NA                                                                              |

520 bp, base pairs; Efs, *E. faecalis*; ID, identity; NA, not analysed

521 a Inferred from depth of coverage relative to chromosomal fragment in hybrid assembly

522 b Amino acid sequence variants compared to the first described *oprA* sequence from pE394 (KP399637)

523 c Incompletely assembled, in four contigs

524

525

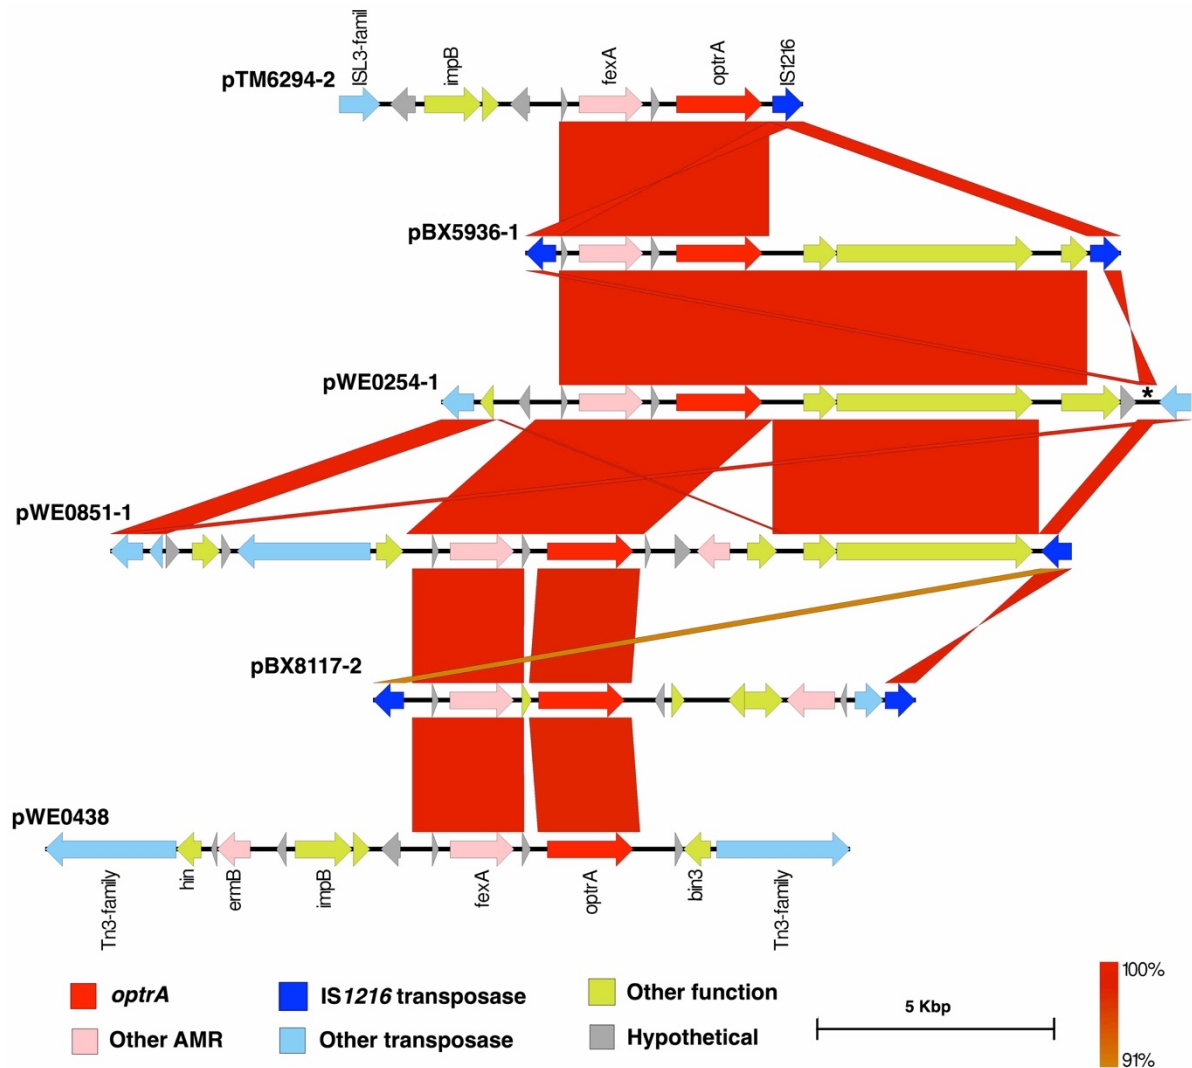

526

527

528 **Figure 1.** Comparison of *optrA* genetic environments. Alignment of *optrA*-carrying  
 529 regions shows limited shared sequence identity, apart from around the *optrA* and  
 530 *fexA* genes. There is evidence of IS1216 near to the *optrA* gene in all isolates (partial  
 531 sequence in pWE0254-1 indicated by asterisk), but other insertion sequences are  
 532 also present suggesting multiple means of *optrA* transmission and ongoing  
 533 diversification of the element. Arrows indicate coding sequences, blocks between  
 534 each sequence indicate regions with BLASTn sequence identity >90% and length  
 535 >100bp.

536

537



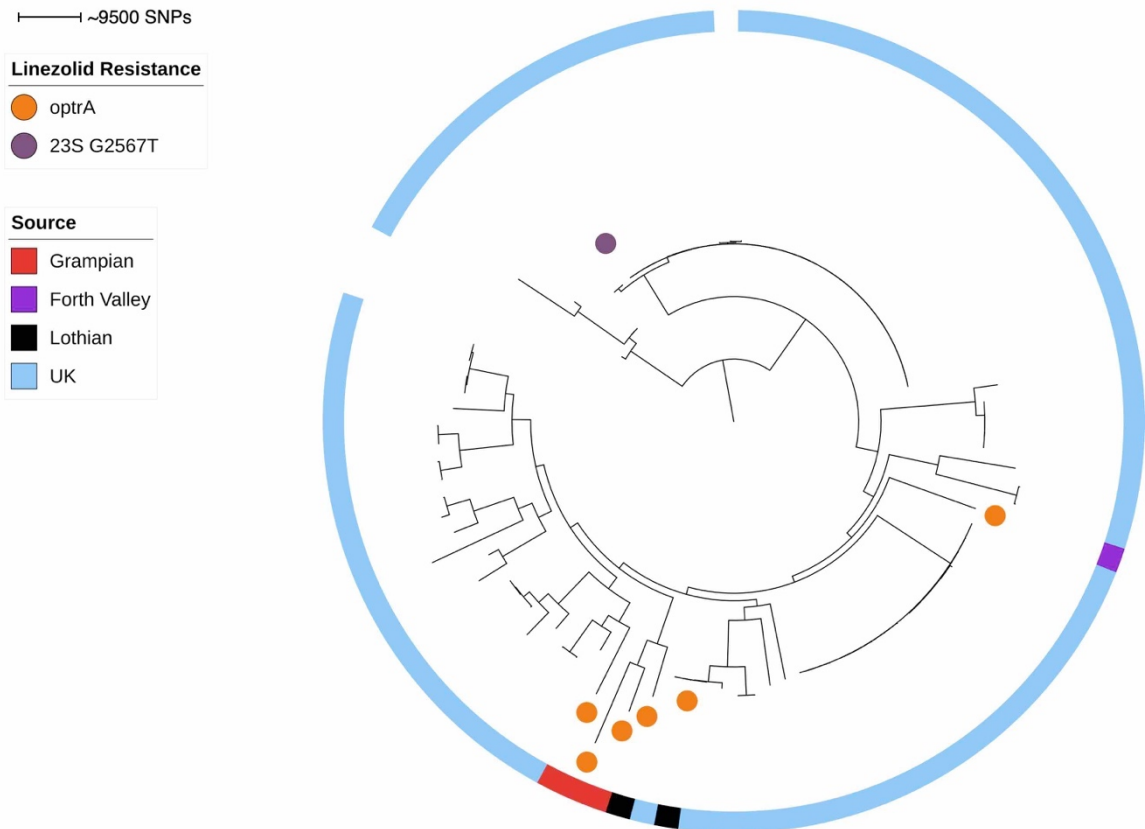

538

539

540

541

542

543

544

545

546

547

**Figure 2.** *optrA*-positive *E. faecalis* isolates in a national perspective. Phylogenetic analysis of the six *optrA*-positive isolates and 94 isolates from bloodstream infections in the UK shows the *optrA*-positive isolates are generally unrelated to others in the collection. Illumina reads were mapped to *E. faecalis* V583 reference genome, mobile genetic elements removed, and a maximum likelihood phylogeny performed on SNP alignment. Scale bar shows ~9500 SNPs, linezolid-resistant isolates are indicated by circles, the outer ring indicates isolate source.

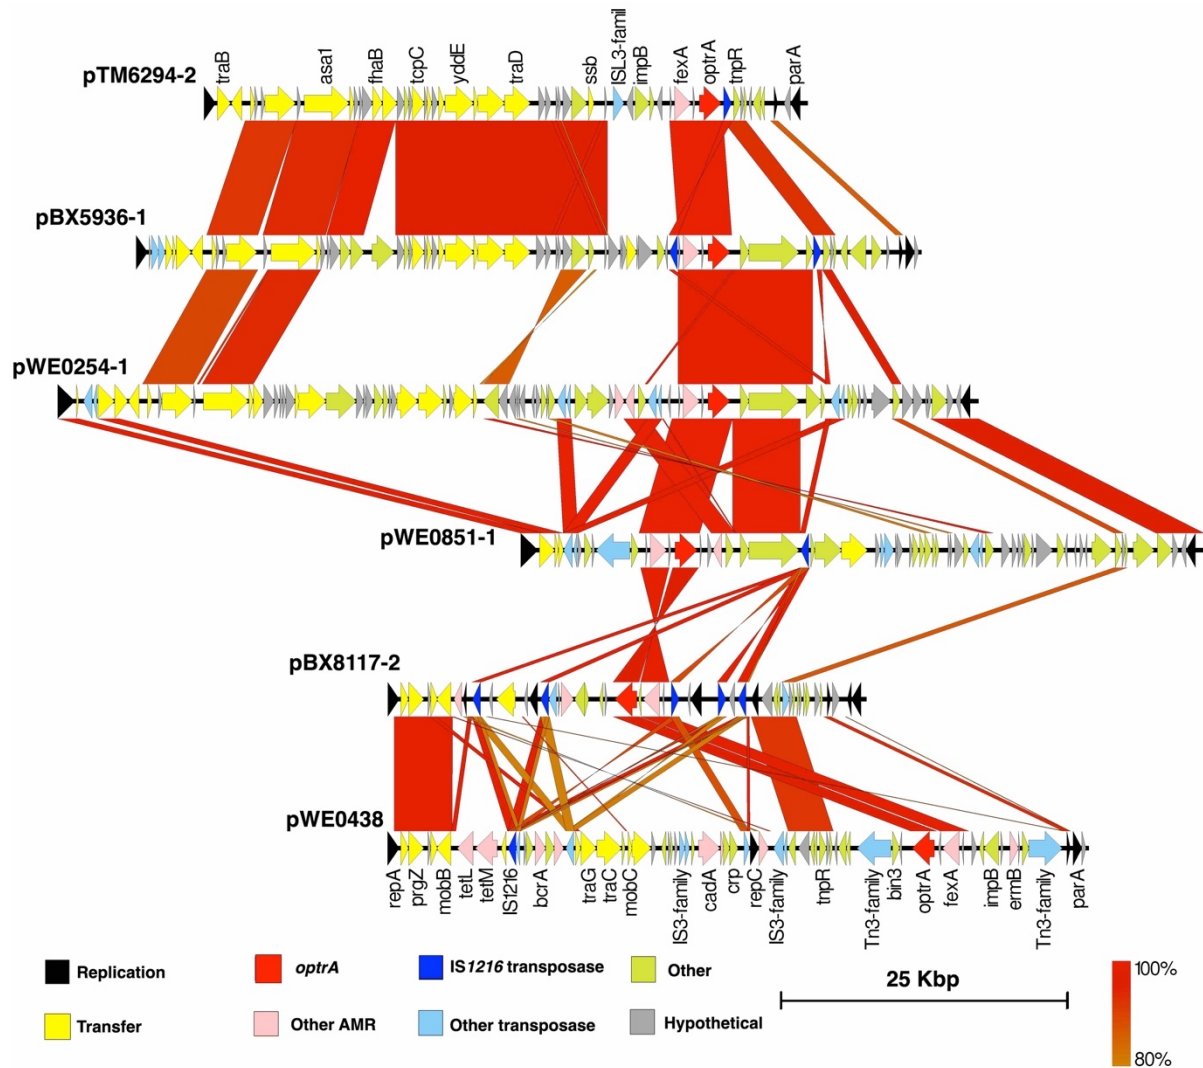

548

549

550

551

552

553

554

555

556

**Figure S1.** Alignment of full *optrA*-positive plasmid sequences. While some sequence similarity is seen between pTM6294-2 and pBX5936-1, in general identity is low between the *optrA*-positive plasmids, indicating *optrA* has mobilised to multiple plasmid backbones. Arrows indicate coding sequences, blocks between each sequence indicate regions with BLASTn sequence identity  $\geq 80\%$  and length  $> 100\text{bp}$ .

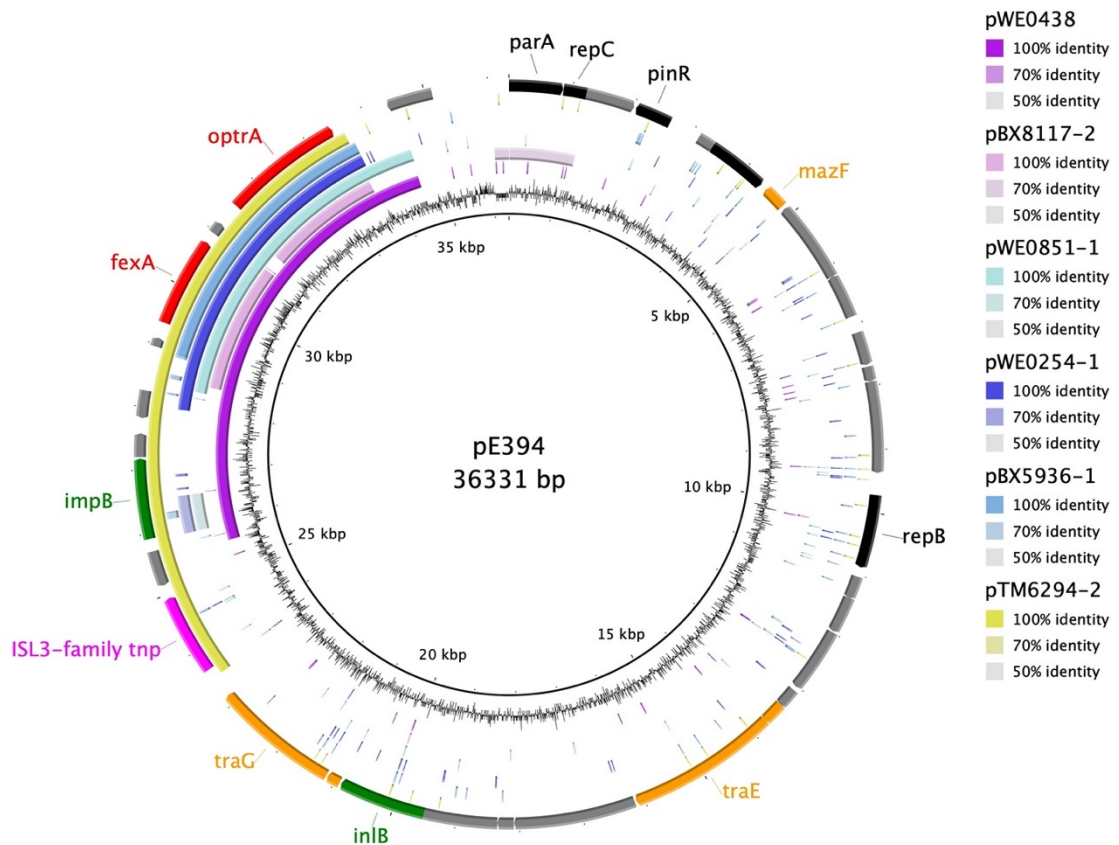

557  
558 **Figure S2.** Alignment of full *optrA*-positive plasmid sequences against pE394.  
559 Sequence similarity confined to the *optrA/fexA* region. Inner ring indicates GC  
560 content of pE394, then alignment of pWE0438, pBX8117-2, pWE0851-1, pWE0254-  
561 1, pBX5936-1, pTM6294-2, and outer ring indicating coding sequences in pE394  
562 (accession KP399637). Figure made with BRIG v0.95  
563
